# Supplementary material for: The Quality and Fertilizing Potential of Red Deer (Cervus elaphus L.) Epididymal Spermatozoa Stored in a Liquid State
Source: MDPI journal article supplement (doi:10.3390/ijms232314591), 2022-11-23
Supplement: s1 [file s1]

**Table S2.** Quality parameters of red deer epididymal spermatozoa ( $n = 5$ ) stored in a liquid state at 5 °C that were used for the *in vitro* fertilization of oocytes and artificial insemination of hinds.

| Sperm quality parameters                | Storage time (days)     |                          |                          |                          |                         |
|-----------------------------------------|-------------------------|--------------------------|--------------------------|--------------------------|-------------------------|
|                                         | Day 1                   | Day 5                    | Day 7                    | Day 10                   | Day 11                  |
| MOR (%)                                 | 71.9 ± 1.3 <sup>a</sup> | 62.2 ± 2.9 <sup>b</sup>  | 63.2 ± 3.8 <sup>b</sup>  | 64.5 ± 3.9 <sup>bc</sup> | 56.0 ± 3.7 <sup>c</sup> |
| NAR (%)                                 | 84.8 ± 2.2 <sup>a</sup> | 81.8 ± 1.6 <sup>ab</sup> | 82.7 ± 2.2 <sup>ab</sup> | 84.0 ± 2.0 <sup>b</sup>  | 79.5 ± 1.6 <sup>b</sup> |
| HD (%)                                  | 11.5 ± 1.5 <sup>a</sup> | 14.5 ± 0.8 <sup>ab</sup> | 14.0 ± 0.8 <sup>ab</sup> | 15.4 ± 1.7 <sup>ab</sup> | 15.5 ± 1.5 <sup>b</sup> |
| MD (%)                                  | 1.8 ± 0.3 <sup>a</sup>  | 2.2 ± 0.6 <sup>a</sup>   | 2.5 ± 0.7                | 1.0 ± 0.2 <sup>a</sup>   | 1.5 ± 0.3 <sup>b</sup>  |
| TD (%)                                  | 7.5 ± 1.2 <sup>a</sup>  | 15.7 ± 4.4 <sup>ab</sup> | 15.1 ± 4.7 <sup>ab</sup> | 14.2 ± 3.7 <sup>b</sup>  | 23.6 ± 5.6 <sup>b</sup> |
| PNA <sup>-</sup> /PI <sup>-</sup> (%)   | 76.2 ± 3.4 <sup>a</sup> | 71.2 ± 1.8 <sup>ab</sup> | 67.5 ± 2.2 <sup>ab</sup> | 60.5 ± 3.8 <sup>b</sup>  | 61.6 ± 5.1 <sup>b</sup> |
| SYBR <sup>+</sup> /PI <sup>-</sup> (%)  | 90.5 ± 0.1 <sup>a</sup> | 86.0 ± 2.0 <sup>ab</sup> | 86.0 ± 3.2 <sup>ab</sup> | 82.0 ± 1.6 <sup>ab</sup> | 80.2 ± 1.3 <sup>b</sup> |
| MMP (%)                                 | 93.1 ± 2.0 <sup>a</sup> | 90.1 ± 2.4 <sup>ab</sup> | 88.1 ± 3.4 <sup>ab</sup> | 81.2 ± 4.1 <sup>b</sup>  | 78.7 ± 3.3 <sup>b</sup> |
| AO (%)                                  | 94.9 ± 1.2              | 91.5 ± 3.4               | 94.3 ± 1.8               | 93.4 ± 0.7               | 89.2 ± 1.6              |
| YOPRO <sup>-</sup> /PI <sup>-</sup> (%) | 88.2 ± 2.0 <sup>a</sup> | 67.0 ± 3.0 <sup>b</sup>  | 66.1 ± 2.5 <sup>b</sup>  | 67.8 ± 2.2 <sup>b</sup>  | 59.7 ± 4.2 <sup>b</sup> |
| YOPRO <sup>+</sup> /PI <sup>-</sup> (%) | 3.5 ± 1.2 <sup>a</sup>  | 15.8 ± 6.3 <sup>b</sup>  | 15.5 ± 6.5 <sup>b</sup>  | 12.4 ± 4.3 <sup>b</sup>  | 18.4 ± 5.7 <sup>b</sup> |

MOR, normal sperm. NAR, normal apical ridge acrosomes. HD, head defects. MD, midpiece defects. TD, tail defects. PNA<sup>-</sup>/PI<sup>-</sup>, acrosomal status. SYBR<sup>+</sup>/PI<sup>-</sup>, viability. MMP, mitochondrial membrane potential. AO, DNA integrity. YOPRO<sup>-</sup>/PI<sup>-</sup>, viable, non-apoptotic sperm. YOPRO<sup>+</sup>/PI<sup>-</sup>, apoptotic sperm. Values are expressed as means ± SEM. Differences between means were determined by Student Newman–Keuls post hoc test. <sup>a-c</sup> Values within a row with different superscripts differ significantly at  $p < 0.05$ .
